# Supplementary figures and images for: A visible-IR responsive BiVO4/TiO2 photoanode with multi-effect point defects for photothermal enhancement of photoelectrochemical water splitting
Source: Royal Society of Chemistry journal article supplement (doi:10.1039/d1cc04572e), 2021-12-04

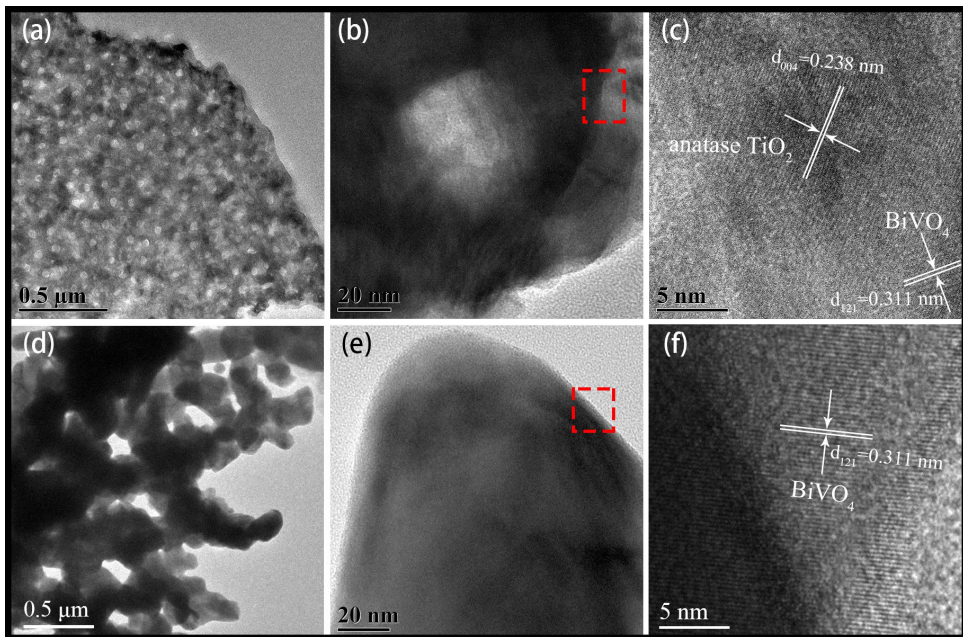

Supplement: d1cc04572e10.pdf [file d1cc04572e10.pdf]

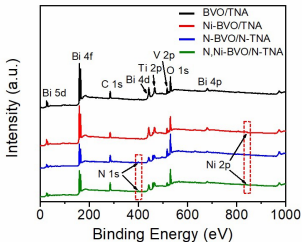

Supplement: d1cc04572e11.pdf [file d1cc04572e11.pdf]

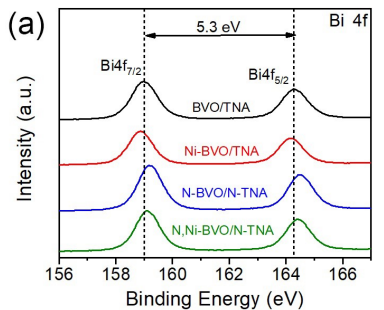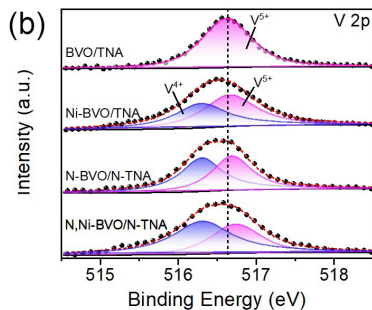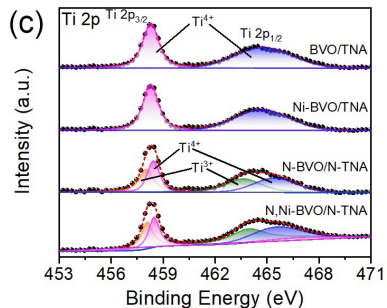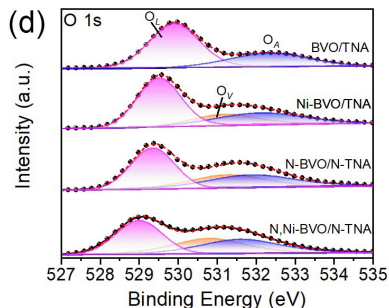

Supplement: d1cc04572e12.pdf [file d1cc04572e12.pdf]

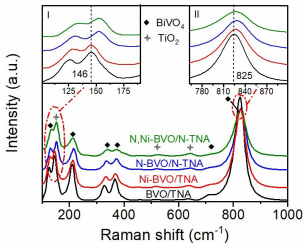

Supplement: d1cc04572e13.pdf [file d1cc04572e13.pdf]

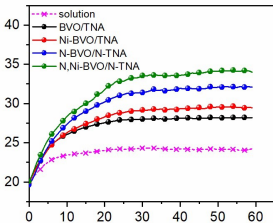

Supplement: d1cc04572e14.pdf [file d1cc04572e14.pdf]

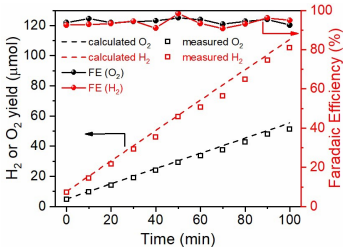

Supplement: d1cc04572e15.pdf [file d1cc04572e15.pdf]

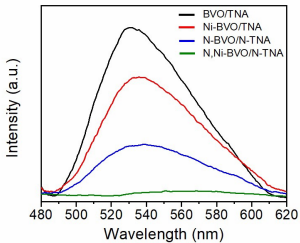

Supplement: d1cc04572e16.pdf [file d1cc04572e16.pdf]

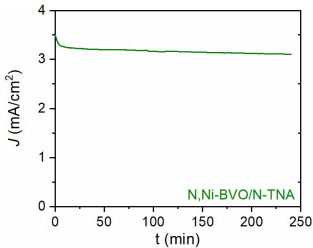

Supplement: d1cc04572e3.pdf [file d1cc04572e3.pdf]

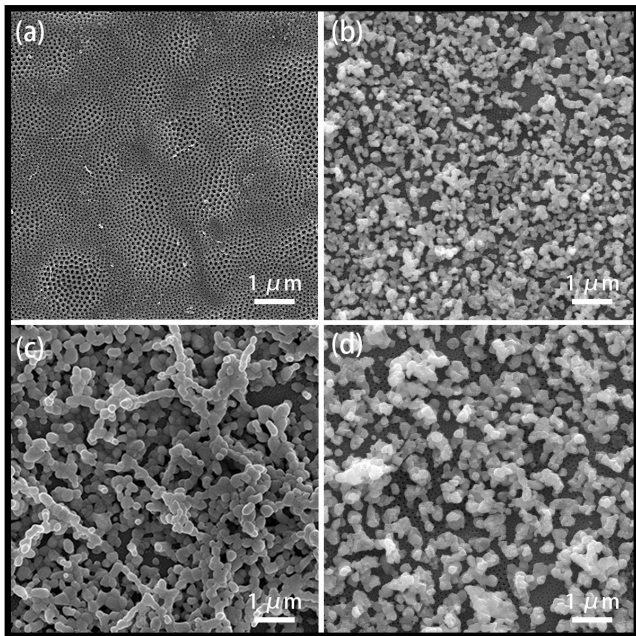

Supplement: d1cc04572e4.pdf [file d1cc04572e4.pdf]

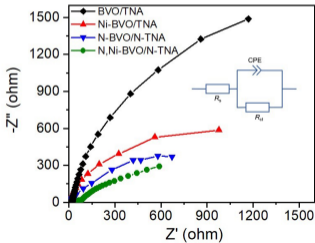

Supplement: d1cc04572e5.pdf [file d1cc04572e5.pdf]

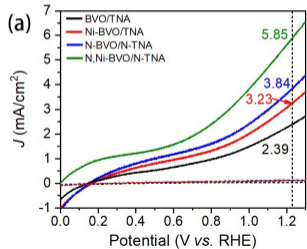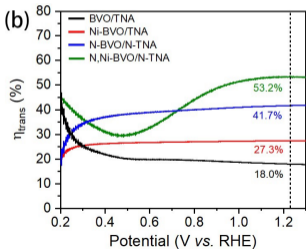

Supplement: d1cc04572e6.pdf [file d1cc04572e6.pdf]

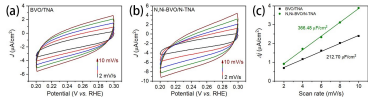

Supplement: d1cc04572e7.pdf [file d1cc04572e7.pdf]

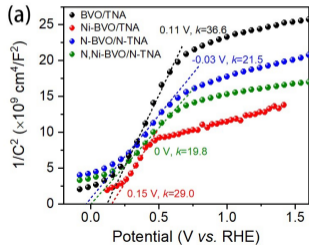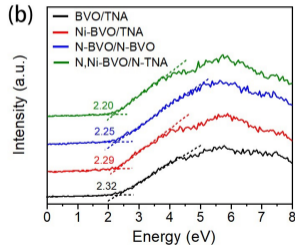

Supplement: d1cc04572e8.pdf [file d1cc04572e8.pdf]

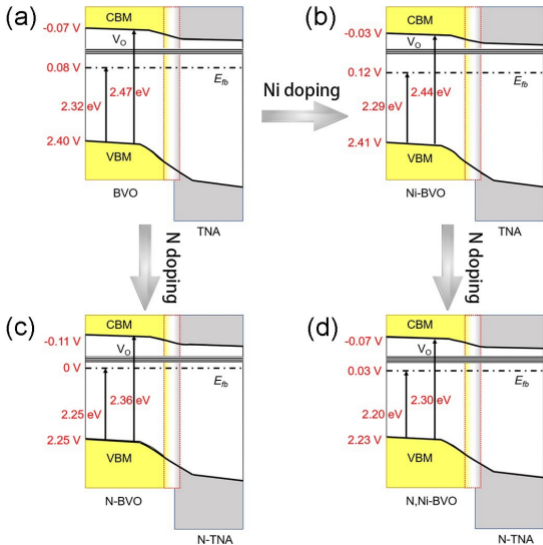

Supplement: d1cc04572e9.pdf [file d1cc04572e9.pdf]
